# Supplementary material for: Isoprene-derived secondary organic aerosol in the global aerosol–chemistry–climate model ECHAM6.3.0–HAM2.3–MOZ1.0
Source: Copernicus journal article supplement (doi:10.5194/gmd-11-3235-2018), 2018-08-13
Supplement: Supplementary file [file gmd-11-3235-2018-supplement-title-page.pdf › gmd-11-3235-2018-supplement-title-page.pdf]

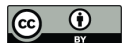

## *Supplement of*

# **Isoprene-derived secondary organic aerosol in the global aerosol–chemistry–climate model ECHAM6.3.0–HAM2.3–MOZ1.0**

**Scarlet Stadtler et al.**

*Correspondence to:* Harri Kokkola ([harri.kokkola@fmi.fi](mailto:harri.kokkola@fmi.fi))

- [gmd-11-3235-2018-supplement-title-page.pdf](#)
- [Stadtler\\_supplement\\_review](#)
  - [supplement1\\_review.pdf](#)
  - [supplement2\\_review.pdf](#)

The copyright of individual parts of the supplement might differ from the CC BY 4.0 License.
