# Supplementary material for: Isoprene-derived secondary organic aerosol in the global aerosol–chemistry–climate model ECHAM6.3.0–HAM2.3–MOZ1.0
Source: Copernicus journal article supplement (doi:10.5194/gmd-11-3235-2018), 2018-08-13
Supplement: Supplementary file [file supplement1_review.pdf › Stadtler_supplement_review/supplement1_review.pdf]

## Supplement 1

Table S1: JAM3 mechanism additional isoprene oxidation reactions compared to the JAM2 mechanism described in Schultz et al. (submitted).

|                                                                                                                                                                                                                                                                                                                                                                                                                                                                                                     |                                                  |                                                                                                                                                                                                                                                                                                                                                                         |
|-----------------------------------------------------------------------------------------------------------------------------------------------------------------------------------------------------------------------------------------------------------------------------------------------------------------------------------------------------------------------------------------------------------------------------------------------------------------------------------------------------|--------------------------------------------------|-------------------------------------------------------------------------------------------------------------------------------------------------------------------------------------------------------------------------------------------------------------------------------------------------------------------------------------------------------------------------|
| $\text{C}_5\text{H}_8 + \text{O}_3 \longrightarrow 0.051 \cdot \text{CH}_3\text{O}_2 + 0.1575 \cdot \text{CH}_3\text{CO} + 0.054 \cdot \text{LHMVKABO}_2 + 0.522 \cdot \text{CO} + 0.068750 \cdot \text{HCOOH} + 0.11 \cdot \text{H}_2\text{O}_2 + 0.324750 \cdot \text{MACR} + 0.1275 \cdot \text{C}_3\text{H}_6 + 0.2625 \cdot \text{HO}_2 + 0.255 \cdot \text{CO}_2 + 0.749750 \cdot \text{CH}_2\text{O} + 0.041250 \cdot \text{MACO}_2\text{H} + 0.27 \cdot \text{OH} + 0.244 \cdot \text{MVK}$ | $7.86 \cdot 10^{-15} \exp(-1913/\text{T})$       |                                                                                                                                                                                                                                                                                                                                                                         |
| $\text{LISOPACO}_2 + \text{CH}_3\text{O}_2 \longrightarrow 0.75 \cdot \text{CH}_2\text{O} + 0.75 \cdot \text{LHC}_4\text{ACCHO} + 0.25 \cdot \text{CH}_3\text{OH} + 0.25 \cdot \text{ISOPA}\text{OH} + \text{HO}_2$                                                                                                                                                                                                                                                                                 | $2.4 \cdot 10^{-12}$                             | products: Tyndall (p.c.)                                                                                                                                                                                                                                                                                                                                                |
| $\text{LISOPACO}_2 \longrightarrow \text{HO}_2 + \text{HPALD}$                                                                                                                                                                                                                                                                                                                                                                                                                                      | $6.198 \cdot 10^8 \cdot \exp(-7700/\text{T})$    | Bulk isomerization (1,6-H-shift) rate constant for all ISOPO2 by Crounse et al. (2011) and adjusted by Fuchs et al. (2013) given as $1.5 * k(\text{ISOPO}_2 + \text{HO}_2) * 2 \cdot 10^{21} \cdot \exp(-9000/\text{T}) \Rightarrow k = 2.05 \cdot 10^{-13} \cdot \exp(1300/\text{T}) \cdot 210^{21} \cdot \exp(-9000/\text{T}) = 6.19810^8 \cdot \exp(-7700/\text{T})$ |
| $\text{ISOPBO}_2 \longrightarrow \text{HO}_2 + \text{HPALD}$                                                                                                                                                                                                                                                                                                                                                                                                                                        | $6.198e + 08 \cdot \exp(-7700./\text{T})$        | see note of [LISOPACO2]                                                                                                                                                                                                                                                                                                                                                 |
| $\text{ISOPDO}_2 \longrightarrow \text{HO}_2 + \text{HPALD}$                                                                                                                                                                                                                                                                                                                                                                                                                                        | $6.198e + 08 \cdot \exp(-7700./\text{T})$        | see note of [LISOPACO2]                                                                                                                                                                                                                                                                                                                                                 |
| $\text{ISOPBO}_2 \longrightarrow \text{HCHO} + \text{MVK} + \text{OH}$                                                                                                                                                                                                                                                                                                                                                                                                                              | $3.570e + 13 \cdot \exp(-10770./\text{T})$       | 1,5-H-shift as in LIM-J by da Silva (2010) and adjusted by Fuchs et al. (2013)                                                                                                                                                                                                                                                                                          |
| $\text{ISOPDO}_2 \longrightarrow \text{HCHO} + \text{MACR} + \text{OH}$                                                                                                                                                                                                                                                                                                                                                                                                                             | $1.905e + 13 \cdot \exp(-10570./\text{T})$       | 1,5-H-shift as in LIM-J by da Silva (2010) and adjusted by Fuchs et al. (2013)                                                                                                                                                                                                                                                                                          |
| $\text{LIECO}_3 + \text{HO}_2 \longrightarrow 0.6 \cdot \text{LIECO}_3\text{H} + 0.4 \cdot \text{CO}_2 + 0.4 \cdot \text{OH} + 0.25 \cdot \text{LHMVKABO}_2 + 0.15 \cdot \text{MACRO}_2$                                                                                                                                                                                                                                                                                                            | $8.207 \cdot 10^{-13} \cdot \exp(980./\text{T})$ | $k$ scaled to $2.2 \cdot 10^{-11}$ as recommended by Winiberg ( $A = 5.2 \cdot 10^{-13} \cdot 1.578$ ); cacm products distribution unchanged (Winiberg et al. (2016) and Groß et al. (2014))                                                                                                                                                                            |
| $\text{LISOPACO}_2 + \text{LISOPACO}_2 \longrightarrow 1.5 \cdot \text{LHC}_4\text{ACCHO} + \text{HO}_2 + 0.5 \cdot \text{ISOPA}\text{OH}$                                                                                                                                                                                                                                                                                                                                                          | $3.350 \cdot 10^{-12}$                           | $k$ : avg. for primary isoprene RO2 MCM (Jenkin et al. (2003), Tab. 3); products: based on the HOCH2CH2O2 self-reaction (Orlando and Tyndall (2012), Tab.8)                                                                                                                                                                                                             |
| $\text{ISOPBO}_2 + \text{ISOPBO}_2 \longrightarrow 2 \cdot \text{MVK} + 2 \cdot \text{CH}_2\text{O} + 2 \cdot \text{HO}_2$                                                                                                                                                                                                                                                                                                                                                                          | $6.900 \cdot 10^{-14}$                           | $k$ : for tertiary isoprene RO2 MCM (Jenkin et al. (2003), Tab. 3)                                                                                                                                                                                                                                                                                                      |

Table S1: JAM3 mechanism additional isoprene oxidation reactions (continued).

|                                                                                                                                                                                                                                                                                                                                                                                |                                        |                                                                                                                                                                                                                                                            |
|--------------------------------------------------------------------------------------------------------------------------------------------------------------------------------------------------------------------------------------------------------------------------------------------------------------------------------------------------------------------------------|----------------------------------------|------------------------------------------------------------------------------------------------------------------------------------------------------------------------------------------------------------------------------------------------------------|
| ISOPDO <sub>2</sub> + ISOPDO <sub>2</sub> $\longrightarrow$ 1.12 · MACR + 1.12 · CH <sub>2</sub> O + 1.12 · HO <sub>2</sub> + 4.800 · 10 <sup>-12</sup><br>0.44 · HCOC <sub>5</sub> + 0.44 · ISOPDOH                                                                                                                                                                           |                                        | $k$ : for secondary isoprene RO <sub>2</sub> MCM (Jenkin et al. (2003), Tab. 3); products: based on the i-C <sub>3</sub> H <sub>7</sub> O <sub>2</sub> self-reaction (Orlando and Tyndall (2012), Tab.8)                                                   |
| LISOPACO <sub>2</sub> + ISOPBO <sub>2</sub> $\longrightarrow$ LHC <sub>4</sub> ACCHO + 0.75 · MVK + 0.75 · CH <sub>2</sub> O + 4.808 · 10 <sup>-13</sup><br>1.5 · HO <sub>2</sub> + 0.25 · ISOPBOH                                                                                                                                                                             |                                        | $k$ : (3.35 · 10 <sup>-12</sup> · 6.9 · 10 <sup>-14</sup> ) <sup>0.5</sup> geometric average of self-reaction $k_s$ (arbitrary estimate by Madronich and Calvert (1990))                                                                                   |
| LISOPACO <sub>2</sub> + ISOPDO <sub>2</sub> $\longrightarrow$ 0.75 · LHC <sub>4</sub> ACCHO + 0.5 · MACR + 4.010 · 10 <sup>-12</sup><br>0.5 · CH <sub>2</sub> O + HO <sub>2</sub> + 0.25 · ISOPAOH + 0.25 · HCOC <sub>5</sub> + 0.25 · ISOPDOH                                                                                                                                 |                                        | $k$ : (3.35 · 10 <sup>-12</sup> · 4.8 · 10 <sup>-12</sup> ) <sup>0.5</sup> geometric average of self-reaction $k$ (arbitrary estimate by Madronich and Calvert (1990))                                                                                     |
| ISOPBO <sub>2</sub> + ISOPDO <sub>2</sub> $\longrightarrow$ 0.75 · MVK + 0.75 · MACR + 1.5 · CH <sub>2</sub> O + 5.755 · 10 <sup>-13</sup><br>1.5 · HO <sub>2</sub> + 0.25 · ISOPBOH + 0.25 · HCOC <sub>5</sub>                                                                                                                                                                |                                        | $k$ : (6.9 · 10 <sup>-14</sup> · 4.8 · 10 <sup>-12</sup> ) <sup>0.5</sup> geometric average of self-reaction $k$ (arbitrary estimate by Madronich and Calvert (1990))                                                                                      |
| LHC <sub>4</sub> ACCO <sub>3</sub> $\longrightarrow$ HO <sub>2</sub> + PACALD                                                                                                                                                                                                                                                                                                  | 1.230 · 10 <sup>9</sup> · exp(-6186/T) | 1,6-H-shift (not bulk!) rate constant for the Z41 isomer as in SI Taraborrelli et al. (2012) 2012                                                                                                                                                          |
| LHC <sub>4</sub> ACCO <sub>3</sub> + HO <sub>2</sub> $\longrightarrow$ 0.37 · LHC <sub>4</sub> ACCO <sub>3</sub> H + 0.12 · LHC <sub>4</sub> ACCO <sub>2</sub> H + 8.207 · 10 <sup>-13</sup> · exp(980/T)<br>0.12 · O <sub>3</sub> + 0.51 · CO <sub>2</sub> + 0.51 · OH + 0.255 · HYAC + 0.255 · GLYALD +<br>0.255 · CH <sub>3</sub> CO + 0.255 · CO + 0.255 · HO <sub>2</sub> |                                        | $k$ scaled to 2.2 · 10 <sup>-11</sup> as recommended by Winiberg ( $A = 5.2 \cdot 10^{-13} \cdot 1.578$ ) ; product distribution in analogy to CH <sub>3</sub> CO <sub>3</sub> + HO <sub>2</sub> reactions (Winiberg et al. (2016) and Groß et al. (2014)) |

Table S2: JAM3 mechanism: ISOPOOH reactions.

|                                                                                                                                                                                                                                                              |                                                                                                                                                                                                                                                                                                                                                               |
|--------------------------------------------------------------------------------------------------------------------------------------------------------------------------------------------------------------------------------------------------------------|---------------------------------------------------------------------------------------------------------------------------------------------------------------------------------------------------------------------------------------------------------------------------------------------------------------------------------------------------------------|
| $\text{LISOPACOOH} + \text{OH} \longrightarrow 0.415 \cdot \text{LIEPOX} + 0.415 \cdot \text{OH} + 1.54 \cdot 10^{-10}$ $0.415 \cdot \text{LISOPOOHO}_2 + .14 \cdot \text{LHC}_4\text{ACCHO} + 0.03 \cdot \text{H}_2\text{O} + 0.03 \cdot \text{LISOPACO}_2$ | <p>k from MCMv3.3.1 and OH-addition branching ratios estimated with site-specific SAR by Peeters et al. (2007) and H-abstraction channel assumed to be like the one for CH<sub>3</sub>OOH + OH reaction and abstraction from the alpha-hydroperoxyl allyl hydrogen estimated by SAR of MOM (Taraborrelli in prep.) being <math>2.12 \cdot 10^{-11}</math></p> |
| $\text{ISOPBOOH} + \text{OH} \longrightarrow 0.63 \cdot \text{LIEPOX} + 0.63 \cdot \text{OH} + 0.12 \cdot \text{LISOPOOHO}_2 + 7.5 \cdot 10^{-11}$ $0.15 \cdot \text{H}_2\text{O} + 0.15 \cdot \text{ISOPBO}_2$                                              | <p>St. Clair et al. (2015)</p>                                                                                                                                                                                                                                                                                                                                |
| $\text{ISOPDOOH} + \text{OH} \longrightarrow 0.79 \cdot \text{LIEPOX} + 0.79 \cdot \text{OH} + 0.14 \cdot \text{LISOPOOHO}_2 + 1.18 \cdot 10^{-10}$ $0.07 \cdot \text{H}_2\text{O} + 0.07 \cdot \text{ISOPDO}_2$                                             | <p>St. Clair et al. (2015)</p>                                                                                                                                                                                                                                                                                                                                |

## References

- Crounse, J. D., Paulot, F., Kjaergaard, H. G., and Wennberg, P. O.: Peroxy radical isomerization in the oxidation of isoprene, *Physical Chemistry Chemical Physics*, 13, 13 607–13 613, 2011.
- da Silva, G.: Carboxylic Acid Catalyzed Keto-Enol Tautomerizations in the Gas Phase, *Angewandte Chemie International Edition*, 49, 7523–7525, 2010.
- Fuchs, H., Hofzumahaus, A., Rohrer, F., Bohn, B., Brauers, T., Dorn, H., Häsel, R., Holland, F., Kaminski, M., Li, X., et al.: Experimental evidence for efficient hydroxyl radical regeneration in isoprene oxidation, *Nature Geoscience*, 6, 1023, 2013.
- Groß, C., Dillon, T., Schuster, G., Lelieveld, J., and Crowley, J.: Direct kinetic study of OH and O<sub>3</sub> formation in the reaction of CH<sub>3</sub>C(O)O<sub>2</sub> with HO<sub>2</sub>, *The Journal of Physical Chemistry A*, 118, 974–985, 2014.
- Jenkin, M., Saunders, S., Wagner, V., and Pilling, M.: Protocol for the development of the Master Chemical Mechanism, MCM v3 (Part B): tropospheric degradation of aromatic volatile organic compounds, *Atmospheric Chemistry and Physics*, 3, 181–193, 2003.
- Madronich, S. and Calvert, J. G.: Permutation reactions of organic peroxy radicals in the troposphere, *Journal of Geophysical Research: Atmospheres*, 95, 5697–5715, 1990.
- Orlando, J. J. and Tyndall, G. S.: Laboratory studies of organic peroxy radical chemistry: an overview with emphasis on recent issues of atmospheric significance, *Chemical Society Reviews*, 41, 6294–6317, 2012.
- Peeters, J., Boullart, W., Pultau, V., Vandenberg, S., and Vereecken, L.: Structure- Activity Relationship for the Addition of OH to (Poly) alkenes: Site-Specific and Total Rate Constants, *The Journal of Physical Chemistry A*, 111, 1618–1631, 2007.

- Schultz, M. G., Stadtler, S., Schroeder, S., Taraborrelli, D., Henrot, A., Kaffashzadeh, N., Franco, B., Ferrachat, S., Siegenthaler-Le Drian, C., Lohmann, U., Neubauer, D., Wahl, S., Kokkola, H., Kuehn, T., Stier, P., Kinnison, D., Tyndall, G., and Orlando, J.: The Chemistry Climate Model ECHAM-HAMMOZ, Global Model Development, submitted.
- St. Clair, J. M., Rivera-Rios, J. C., Crounse, J. D., Knap, H. C., Bates, K. H., Teng, A. P., Jørgensen, S., Kjaergaard, H. G., Keutsch, F. N., and Wennberg, P. O.: Kinetics and products of the reaction of the first-generation isoprene hydroxy hydroperoxide (ISOPOOH) with OH, *The Journal of Physical Chemistry A*, 120, 1441–1451, 2015.
- Taraborrelli, D., Lawrence, M., Crowley, J., Dillon, T., Gromov, S., Groß, C., Vereecken, L., and Lelieveld, J.: Hydroxyl radical buffered by isoprene oxidation over tropical forests, *Nature Geoscience*, 5, 190, 2012.
- Winiberg, F. A., Dillon, T. J., Orr, S. C., Groß, C. B., Bejan, I., Brumby, C. A., Evans, M. J., Smith, S. C., Heard, D. E., and Seakins, P. W.: Direct measurements of OH and other product yields from the  $\text{HO}_2 + \text{CH}_3\text{C}(\text{O})\text{O}_2$  reaction, *Atmospheric Chemistry and Physics*, 16, 4023–4042, 2016.
